# Supplementary material for: CXCR4high megakaryocytes regulate host-defense immunity against bacterial pathogens
Source: eLife. 2022 Jul 29;11:e78662. doi: 10.7554/eLife.78662 (PMC9374440; doi:10.7554/eLife.78662)
Supplement: Figure 1—source data 1. [file elife-78662-fig1-data1.xlsx]

## Sheet: MK1-5_signature_genes
gene	p_val	avg_logFC	pct.1	pct.2	p_val_adj	cluster
Ube2c	3.95958e-114	1.4762	0.86	0.498	5.77148e-110	MK1
Mki671	1.26174e-203	1.39391	1	0.775	1.83912e-199	MK1
Cenpf	3.46633e-130	1.26178	0.912	0.577	5.05252e-126	MK1
Top2a	3.3117e-180	1.25969	0.982	0.762	4.82714e-176	MK1
Hist1h1b	2.57817e-109	1.21272	0.878	0.637	3.75794e-105	MK1
Birc5	9.47263e-196	1.17757	0.985	0.567	1.38073e-191	MK1
Hist1h2ap	1.74535e-132	1.16665	0.927	0.803	2.54402e-128	MK1
Hist1h2ae	5.81069e-111	1.1048	0.898	0.749	8.46966e-107	MK1
H2afx	3.2285e-142	1.09352	0.951	0.832	4.70587e-138	MK1
Tpx2	1.76237e-148	1.06225	0.906	0.513	2.56884e-144	MK1
Kif11	2.83609e-171	1.05094	0.932	0.468	4.13389e-167	MK1
Nusap1	2.26422e-150	1.04193	0.883	0.412	3.30033e-146	MK1
Prc1	3.4026e-128	1.04177	0.877	0.497	4.95964e-124	MK1
Tubb4b	9.49505e-176	1.03927	1	0.903	1.384e-171	MK1
Cdca8	3.24929e-170	1.03354	0.985	0.658	4.73616e-166	MK1
Hmmr	2.71434e-122	1.01586	0.828	0.407	3.95643e-118	MK1
Cenpa	1.00614e-71	1.01192	0.79	0.548	1.46655e-67	MK1
Cdk1	1.05713e-147	0.99725	0.942	0.656	1.54087e-143	MK1
Cdc20	1.26263e-96	0.982799	0.825	0.525	1.84041e-92	MK1
Tubb5	8.69285e-183	0.978868	1	0.977	1.26707e-178	MK1
Cenpe	2.38396e-122	0.955071	0.895	0.551	3.47487e-118	MK1
Ccnb1	8.42907e-97	0.91895	0.795	0.454	1.22862e-92	MK1
Hist1h4d	1.08955e-111	0.904693	0.878	0.63	1.58812e-107	MK1
Hmgb2	3.72752e-176	0.903814	1	0.993	5.43323e-172	MK1
Smc4	2.48474e-164	0.889071	0.995	0.936	3.62176e-160	MK1
Incenp	5.68588e-148	0.880703	0.963	0.624	8.28774e-144	MK1
Knl1	4.55217e-146	0.874889	0.922	0.555	6.63525e-142	MK1
Pimreg	3.86548e-132	0.871168	0.731	0.172	5.63432e-128	MK1
Hist1h2ab	5.59808e-102	0.844935	0.738	0.328	8.15976e-98	MK1
Tuba1b	1.89556e-170	0.842306	0.998	0.989	2.76296e-166	MK1
Ccna2	2.30617e-150	0.839724	0.919	0.462	3.36147e-146	MK1
Aspm	1.76092e-103	0.838313	0.709	0.244	2.56672e-99	MK1
Aurkb	7.44543e-151	0.832763	0.896	0.451	1.08525e-146	MK1
Spc24	2.11455e-147	0.82845	0.963	0.672	3.08217e-143	MK1
Ckap2l	2.26823e-130	0.808886	0.968	0.862	3.30617e-126	MK1
Cdca3	2.92464e-142	0.80708	0.918	0.488	4.26296e-138	MK1
Plk1	1.22126e-105	0.788007	0.728	0.272	1.78011e-101	MK1
Kif15	3.33069e-134	0.780982	0.903	0.469	4.85482e-130	MK1
Ccnb2	3.34377e-80	0.774606	0.826	0.534	4.87387e-76	MK1
Arl6ip1	3.45593e-45	0.766659	0.933	0.871	5.03736e-41	MK1
Cks1b	1.58985e-163	0.756397	0.997	0.889	2.31737e-159	MK1
Mis18bp1	4.99608e-106	0.745008	0.799	0.388	7.28229e-102	MK1
Lockd	1.93279e-123	0.744712	0.927	0.635	2.81724e-119	MK1
Kif22	5.85354e-112	0.727425	0.808	0.386	8.53212e-108	MK1
Pclaf	8.80778e-73	0.727244	0.802	0.504	1.28382e-68	MK1
Bub1b	3.81038e-114	0.726615	0.854	0.467	5.554e-110	MK1
Spag5	2.1655e-135	0.718218	0.772	0.193	3.15643e-131	MK1
Kif20b	2.80701e-99	0.717523	0.848	0.519	4.0915e-95	MK1
Aurka	2.58291e-119	0.712995	0.63	0.107	3.76485e-115	MK1
Hist1h3c	2.97394e-114	0.711846	0.686	0.17	4.33481e-110	MK1
Smc2	4.75665e-132	0.710467	0.989	0.863	6.93329e-128	MK1
Ube2s	5.24666e-132	0.709649	1	0.965	7.64753e-128	MK1
Cks2	7.63138e-99	0.708224	0.994	0.919	1.11235e-94	MK1
Nuf2	1.5378e-151	0.70167	0.714	0.099	2.2415e-147	MK1
Pbk	2.33089e-100	0.693667	0.82	0.455	3.3975e-96	MK1
Esco2	3.58602e-123	0.689478	0.703	0.148	5.22698e-119	MK1
Sgo2a	7.32662e-139	0.674662	0.651	0.074	1.06793e-134	MK1
Racgap1	3.43084e-98	0.673929	0.833	0.479	5.0008e-94	MK1
Kif4	6.07917e-127	0.673784	0.694	0.139	8.861e-123	MK1
Hjurp	1.65829e-98	0.661527	0.947	0.801	2.41712e-94	MK1
Ckap5	1.23462e-85	0.661288	0.871	0.679	1.79958e-81	MK1
Kif23	7.32648e-84	0.647295	0.619	0.168	1.06791e-79	MK1
Cdkn3	1.91222e-83	0.640483	0.513	0.097	2.78725e-79	MK1
Shcbp1	7.60709e-131	0.637622	0.691	0.122	1.10881e-126	MK1
Espl1	1.81274e-142	0.637322	0.653	0.072	2.64224e-138	MK1
Kif2c	4.33209e-131	0.635099	0.586	0.049	6.31446e-127	MK1
Nucks1	1.49731e-147	0.634094	1	1	2.18248e-143	MK1
Hist1h1a	1.16075e-78	0.632635	0.641	0.227	1.69191e-74	MK1
Anln	6.85131e-118	0.627211	0.685	0.153	9.98647e-114	MK1
Hist2h2ac	4.04966e-67	0.626637	0.749	0.493	5.90278e-63	MK1
Ska1	1.08247e-136	0.625896	0.61	0.057	1.5778e-132	MK1
Spc25	2.40031e-93	0.624909	0.778	0.378	3.49869e-89	MK1
Knstrn	1.38601e-74	0.62457	0.823	0.551	2.02026e-70	MK1
Gas2l3	1.68327e-52	0.619749	0.705	0.485	2.45354e-48	MK1
Bub1	3.90352e-127	0.618357	0.616	0.079	5.68977e-123	MK1
Tuba1c	1.38594e-71	0.60996	0.886	0.646	2.02014e-67	MK1
Hist1h2bj	4.89068e-104	0.609574	0.615	0.119	7.12865e-100	MK1
Cit	2.77772e-89	0.595876	0.857	0.555	4.0488e-85	MK1
Neil3	4.10065e-117	0.595583	0.616	0.093	5.9771e-113	MK1
Cenpw	6.44095e-101	0.585858	0.944	0.749	9.38833e-97	MK1
Arhgap19	1.21408e-108	0.585628	0.553	0.067	1.76964e-104	MK1
Trim59	1.58499e-97	0.583414	0.594	0.124	2.31028e-93	MK1
Fbxo5	7.66954e-77	0.582263	0.776	0.466	1.11791e-72	MK1
Nek2	1.27482e-106	0.581208	0.531	0.064	1.85817e-102	MK1
Ndc80	1.52057e-122	0.576594	0.676	0.119	2.21639e-118	MK1
Tyms	6.12259e-54	0.575453	0.88	0.773	8.92429e-50	MK1
Tuba8	6.57804e-98	0.575076	0.968	0.875	9.58816e-94	MK1
Stmn1	4.33449e-96	0.572464	1	0.996	6.31795e-92	MK1
Cdca5	2.31541e-116	0.571051	0.68	0.136	3.37494e-112	MK1
Cdca2	1.36599e-94	0.570574	0.676	0.201	1.99107e-90	MK1
Hist1h1e	4.85134e-50	0.569639	0.883	0.831	7.07131e-46	MK1
Foxm1	1.09116e-134	0.568999	0.632	0.069	1.59048e-130	MK1
Arhgap11a	4.0876e-75	0.567013	0.776	0.445	5.95808e-71	MK1
Sgo1	1.9534e-85	0.564935	0.729	0.295	2.84728e-81	MK1
Ncapg	6.22896e-90	0.562751	0.723	0.272	9.07933e-86	MK1
Dlgap5	8.37726e-80	0.561301	0.616	0.19	1.22107e-75	MK1
Cdc25b	2.32624e-75	0.559564	0.513	0.116	3.39073e-71	MK1
Kpna2	1.67457e-63	0.555713	0.542	0.179	2.44085e-59	MK1
Hist1h3e	9.38378e-59	0.551574	0.763	0.539	1.36778e-54	MK1
Tacc3	3.81147e-84	0.550152	0.851	0.555	5.5556e-80	MK1
Ncapd2	7.01482e-92	0.549863	0.884	0.597	1.02248e-87	MK1
Ccdc34	4.71935e-87	0.544337	0.954	0.78	6.87892e-83	MK1
Rad21	6.77346e-77	0.540538	0.971	0.845	9.87299e-73	MK1
Tk1	8.30221e-44	0.538268	0.583	0.305	1.21013e-39	MK1
G2e3	5.92637e-65	0.535873	0.603	0.227	8.63828e-61	MK1
Iqgap3	2.99686e-115	0.53403	0.545	0.055	4.36822e-111	MK1
Kif20a	2.02518e-113	0.529111	0.527	0.048	2.9519e-109	MK1
Ckap2	3.34728e-57	0.516321	0.718	0.425	4.879e-53	MK1
Cenpp	1.11033e-98	0.515938	0.615	0.129	1.61842e-94	MK1
C330027C09Rik	5.60747e-86	0.511236	0.58	0.136	8.17345e-82	MK1
Kif14	5.11339e-110	0.509883	0.487	0.035	7.45328e-106	MK1
Bub3	8.84843e-60	0.506255	0.938	0.891	1.28975e-55	MK1
Tuba4a	2.37819e-88	0.492637	0.997	0.975	3.46646e-84	MK1
H2afz	2.36587e-140	0.49187	1	1	3.4485e-136	MK1
Hist1h3f	3.91783e-79	0.488978	0.513	0.108	5.71063e-75	MK1
Dbf4	4.42763e-61	0.48869	0.79	0.573	6.45371e-57	MK1
Kifc1	3.43992e-95	0.484671	0.518	0.076	5.01403e-91	MK1
Ttk	2.37773e-97	0.482844	0.543	0.085	3.46577e-93	MK1
Melk	4.93706e-97	0.482094	0.534	0.082	7.19625e-93	MK1
Ung	5.54045e-121	0.65454	0.643	0.103	8.07576e-117	MK2
Cdca7	1.80039e-110	0.617734	0.988	0.883	2.62425e-106	MK2
Mcm2	1.76235e-94	0.608697	0.977	0.825	2.5688e-90	MK2
Mcm3	1.75475e-90	0.595019	0.99	0.919	2.55772e-86	MK2
Mcm6	8.05095e-84	0.536222	0.99	0.869	1.17351e-79	MK2
Hells	1.9511e-47	0.534829	0.808	0.628	2.84392e-43	MK2
S100a9	1.84976e-18	4.78566	1	0.928	2.69621e-14	MK3
Camp	1.21437e-07	4.78508	0.514	0.233	0.00177007	MK3
S100a8	9.82827e-18	4.76881	1	0.871	1.43257e-13	MK3
Ngp	2.43791e-08	4.42688	0.514	0.216	0.00035535	MK3
Lcn2	1.09637e-14	3.81977	0.657	0.231	1.59807e-10	MK3
Ltf	6.29104e-14	3.61701	0.486	0.116	9.16982e-10	MK3
Wfdc21	3.12204e-36	3.00713	0.629	0.074	4.55069e-32	MK3
Retnlg1	1.68349e-13	2.82859	0.686	0.271	2.45385e-09	MK3
Chil31	5.43394e-11	2.80819	0.457	0.125	7.92051e-07	MK3
Ppbp	4.53641e-07	2.41012	0.457	0.174	0.00661226	MK3
Ifitm61	1.77979e-37	2.35842	0.657	0.078	2.59422e-33	MK3
S100a61	2.22214e-13	2.33087	0.686	0.272	3.23899e-09	MK3
Lyz21	5.81172e-17	2.24	1	0.931	8.47116e-13	MK3
Mmp9	1.84772e-39	2.00734	0.629	0.064	2.69324e-35	MK3
Cybb1	1.68793e-24	1.94412	0.514	0.07	2.46033e-20	MK3
Pglyrp11	1.30479e-19	1.93685	0.686	0.17	1.90186e-15	MK3
Alox12	2.08491e-15	1.89781	0.4	0.066	3.03896e-11	MK3
Hp1	1.35192e-29	1.80751	0.657	0.102	1.97056e-25	MK3
Cd177	1.4051e-45	1.79337	0.514	0.034	2.04807e-41	MK3
Cxcl2	5.35942e-06	1.77745	0.457	0.204	0.0781189	MK3
Myl9	3.50563e-35	1.70898	0.314	0.015	5.1098e-31	MK3
Clec1b	0.000552386	1.66545	0.514	0.346	1	MK3
Il1b	8.06354e-06	1.65897	0.514	0.264	0.117534	MK3
Anxa11	7.77432e-09	1.65148	0.571	0.232	0.000113318	MK3
Cd522	9.22041e-17	1.60442	1	0.466	1.34397e-12	MK3
Parvb	2.61278e-09	1.59884	0.514	0.171	3.80839e-05	MK3
Mmp81	1.39154e-25	1.59438	0.429	0.045	2.02831e-21	MK3
Gas2l1	3.11779e-08	1.57467	0.371	0.104	0.000454449	MK3
Tpm41	4.22244e-05	1.48943	0.829	0.597	0.615463	MK3
Thbs1	1.20519e-10	1.37534	0.486	0.142	1.75668e-06	MK3
Ly6g	4.43362e-73	1.34659	0.543	0.02	6.46244e-69	MK3
Msrb12	4.98433e-15	1.27015	0.971	0.541	7.26515e-11	MK3
Lrg1	8.44405e-92	1.22572	0.629	0.02	1.2308e-87	MK3
Slpi	2.97672e-07	1.21841	0.629	0.32	0.00433887	MK3
Mcemp11	3.41565e-51	1.21307	0.629	0.046	4.97866e-47	MK3
Ywhah	0.000531171	1.20787	1	0.989	1	MK3
Wfdc171	2.49259e-09	1.1967	0.4	0.105	3.6332e-05	MK3
S100a111	1.04842e-08	1.18138	1	0.814	0.000152817	MK3
Ly6c21	4.26258e-26	1.16725	0.571	0.078	6.21313e-22	MK3
Mmd	1.00611e-08	1.16709	0.514	0.185	0.00014665	MK3
F5	0.00312955	1.12106	0.429	0.267	1	MK3
Prdx51	3.0023e-15	1.11251	1	0.959	4.37615e-11	MK3
Mkrn12	1.93528e-06	1.10789	0.914	0.747	0.0282087	MK3
Csf3r	4.73705e-22	1.09682	0.571	0.095	6.90473e-18	MK3
Stfa2l1	2.11918e-13	1.04929	0.2	0.018	3.08892e-09	MK3
Lsp12	5.19859e-15	1.04648	0.686	0.2	7.57747e-11	MK3
1810058I24Rik	0.00019227	1.0406	0.971	0.993	1	MK3
C31	3.60506e-36	1.03017	0.486	0.038	5.25474e-32	MK3
Flna1	3.72224e-13	1.02863	1	0.877	5.42554e-09	MK3
Rnf19b	0.000363731	1.02802	0.486	0.266	1	MK3
Mgst11	8.04933e-33	1.02698	0.543	0.057	1.17327e-28	MK3
Trem3	9.02353e-72	1.02218	0.543	0.02	1.31527e-67	MK3
Nptn1	0.00444122	1.0157	0.686	0.64	1	MK3
Dstn	4.02036e-08	0.996176	0.943	0.795	0.000586008	MK3
Adpgk	2.69611e-06	0.986223	0.571	0.305	0.0392985	MK3
Ncf41	6.7832e-16	0.984708	0.629	0.165	9.88719e-12	MK3
G0s2	1.05426e-38	0.981359	0.371	0.019	1.53668e-34	MK3
AA467197	3.39998e-62	0.969045	0.429	0.014	4.95582e-58	MK3
Igtp1	8.21584e-06	0.968378	0.457	0.19	0.119754	MK3
Gsn1	1.23965e-13	0.963339	0.857	0.385	1.80691e-09	MK3
Chil1	3.03722e-73	0.952819	0.457	0.013	4.42705e-69	MK3
Cebpe	5.48023e-44	0.952819	0.314	0.011	7.98798e-40	MK3
Stx11	2.30065e-07	0.951246	0.657	0.338	0.00335343	MK3
Zfand3	0.0063836	0.949869	0.486	0.348	1	MK3
Cebpd1	1.70681e-19	0.947922	0.629	0.131	2.48784e-15	MK3
Cald1	3.22436e-11	0.929973	0.257	0.037	4.69983e-07	MK3
Fpr2	5.66727e-111	0.919078	0.571	0.011	8.26062e-107	MK3
Gp6	8.89997e-09	0.912601	0.257	0.049	0.000129726	MK3
Rflnb	1.31083e-36	0.908696	0.6	0.061	1.91066e-32	MK3
Pirb2	8.83292e-36	0.902892	0.657	0.075	1.28749e-31	MK3
Slc6a41	8.57349e-05	0.891202	0.2	0.054	1	MK3
Cyba2	1.42883e-07	0.878864	1	0.963	0.00208266	MK3
Cd24a1	5.06283e-13	0.877535	0.6	0.171	7.37958e-09	MK3
Tubb2a1	0.000268786	0.877259	0.486	0.265	1	MK3
Plbd11	7.24515e-46	0.8698	0.6	0.046	1.05605e-41	MK3
Hist1h2bc1	0.00729301	0.867017	0.771	0.671	1	MK3
Smim31	0.00277889	0.862417	0.486	0.304	1	MK3
Itgam2	3.3615e-19	0.859888	0.6	0.112	4.89972e-15	MK3
Ube2o	5.65957e-08	0.85963	0.543	0.209	0.000824939	MK3
Itgb21	1.3777e-12	0.855892	0.857	0.392	2.00814e-08	MK3
Lst11	1.49942e-11	0.839683	0.686	0.254	2.18555e-07	MK3
Ckap4	7.16681e-05	0.830763	0.514	0.328	1	MK3
Ncf11	8.69752e-07	0.827203	0.629	0.329	0.0126775	MK3
Myl61	1.30107e-05	0.818685	1	1	0.189643	MK3
Mxd11	6.35403e-08	0.811767	0.686	0.365	0.000926163	MK3
Serpinb6a	0.00090739	0.807072	0.4	0.199	1	MK3
Sorl12	6.28406e-19	0.8018	0.657	0.134	9.15964e-15	MK3
Gm5483	1.67569e-06	0.791526	0.114	0.014	0.0244249	MK3
Slc7a11	4.92057e-24	0.782927	0.314	0.024	7.17223e-20	MK3
Aldh2	6.88843e-11	0.777553	1	0.998	1.00406e-06	MK3
Pygl1	1.02449e-09	0.777362	0.8	0.4	1.4933e-05	MK3
Klf22	2.20319e-11	0.774705	0.943	0.405	3.21137e-07	MK3
Zyx1	2.59665e-06	0.772971	1	0.992	0.0378487	MK3
F630028O10Rik	3.52557e-12	0.760152	0.514	0.139	5.13888e-08	MK3
Tmsb4x1	1.11421e-06	0.758438	1	0.999	0.0162407	MK3
Clec4e	1.16604e-15	0.749759	0.429	0.073	1.69963e-11	MK3
Ltb4r11	3.036e-17	0.74785	0.543	0.106	4.42527e-13	MK3
Slfn1	1.80351e-41	0.742425	0.486	0.032	2.6288e-37	MK3
Trib11	5.117e-18	0.734855	0.571	0.106	7.45855e-14	MK3
Vsir1	8.11286e-10	0.732756	0.657	0.264	1.18253e-05	MK3
Taldo12	1.45064e-11	0.731414	1	0.977	2.11445e-07	MK3
Arhgdib2	2.92062e-08	0.730447	1	0.982	0.00042571	MK3
Gp1ba1	0.000127393	0.717105	0.514	0.269	1	MK3
Hist1h1c1	0.0030633	0.715931	0.914	0.758	1	MK3
Hpse	1.57235e-06	0.71497	0.2	0.039	0.0229185	MK3
Asprv1	2.60402e-18	0.710957	0.257	0.021	3.79562e-14	MK3
Plaur	2.95152e-30	0.710735	0.486	0.047	4.30213e-26	MK3
6430548M08Rik	5.64621e-69	0.700662	0.514	0.018	8.22991e-65	MK3
Trem1	1.21285e-50	0.697746	0.429	0.018	1.76785e-46	MK3
Fth12	8.56151e-06	0.696491	1	1	0.124793	MK3
Nfam11	6.3571e-08	0.69448	0.629	0.274	0.000926611	MK3
Ptpn12	3.25572e-05	0.687491	0.914	0.801	0.474553	MK3
Itgb2l	7.77551e-77	0.685425	0.4	0.008	1.13336e-72	MK3
Clec4a21	9.79796e-47	0.683291	0.457	0.024	1.42815e-42	MK3
Anxa22	1.15475e-09	0.682447	0.657	0.242	1.68316e-05	MK3
Gsr1	4.4345e-10	0.680249	0.971	0.648	6.46372e-06	MK3
Litaf1	9.06444e-07	0.679815	0.771	0.418	0.0132123	MK3
Actn11	3.36804e-08	0.673929	0.714	0.375	0.000490925	MK3
Tyrobp1	1.60697e-13	0.665417	1	0.358	2.34232e-09	MK3
Cebpb1	4.19902e-06	0.665069	0.629	0.302	0.061205	MK3
Orm1	7.30597e-82	0.662372	0.286	0.002	1.06492e-77	MK3
Fgr1	3.92232e-41	0.646657	0.571	0.046	5.71717e-37	MK3
Cnn21	1.14295e-05	0.638426	1	0.875	0.166597	MK3
Cxcr21	2.28587e-11	0.629996	0.543	0.133	3.33189e-07	MK3
Slfn4	1.00925e-30	0.629883	0.457	0.04	1.47109e-26	MK3
B430306N03Rik	1.55155e-43	0.624785	0.514	0.034	2.26155e-39	MK3
Pilra	2.13326e-48	0.623839	0.486	0.026	3.10944e-44	MK3
Clec12a2	9.85779e-16	0.623721	0.429	0.069	1.43687e-11	MK3
Gda	3.6878e-06	0.620203	0.571	0.293	0.0537534	MK3
Fcer1g2	5.292e-08	0.609108	1	0.753	0.000771361	MK3
Itgal1	1.78345e-12	0.608668	0.571	0.141	2.59955e-08	MK3
Tgfbi1	1.31381e-12	0.6084	0.486	0.111	1.91501e-08	MK3
Ecm1	0.00364093	0.608072	0.2	0.079	1	MK3
Itgb5	1.1651e-06	0.607307	0.171	0.029	0.0169825	MK3
Prr131	7.81919e-05	0.60715	0.886	0.692	1	MK3
Hsd11b1	1.74231e-55	0.598968	0.457	0.019	2.53959e-51	MK3
Spi12	2.9844e-08	0.595661	0.743	0.336	0.000435006	MK3
Cd2261	0.00457292	0.595048	0.143	0.046	1	MK3
Bicd2	0.00106597	0.594075	0.771	0.527	1	MK3
Marcks1	5.19082e-08	0.58937	0.457	0.147	0.000756614	MK3
Hpcal1	6.61223e-06	0.582196	0.514	0.234	0.0963799	MK3
Gadd45a1	4.52416e-12	0.582051	0.543	0.14	6.59442e-08	MK3
Mpig6b	4.06552e-07	0.579769	0.229	0.047	0.0059259	MK3
Alox5ap1	2.36537e-10	0.566136	1	0.897	3.44776e-06	MK3
Ly6g6f	4.33509e-09	0.566082	0.2	0.028	6.31883e-05	MK3
C5ar11	1.93628e-21	0.562832	0.486	0.063	2.82232e-17	MK3
Anxa31	5.11511e-06	0.558103	0.4	0.144	0.0745578	MK3
Lpin21	0.00540434	0.556094	0.657	0.474	1	MK3
Ifi27l2a1	1.26014e-09	0.554402	0.486	0.127	1.83678e-05	MK3
Lcp11	4.23254e-12	0.553091	0.943	0.347	6.16935e-08	MK3
Pls1	0.00354317	0.550632	0.343	0.182	1	MK3
Dhrs7	5.50087e-08	0.546529	0.543	0.206	0.000801806	MK3
Ceacam1	8.28257e-11	0.54406	0.429	0.104	1.20727e-06	MK3
Aldh3b11	4.25722e-40	0.54125	0.4	0.021	6.20532e-36	MK3
Ftl12	3.05437e-05	0.540505	1	1	0.445205	MK3
Lyn2	0.000530513	0.537209	0.914	0.711	1	MK3
Cd33	3.36021e-34	0.536633	0.4	0.026	4.89785e-30	MK3
Grina1	5.68176e-06	0.535587	0.714	0.37	0.0828174	MK3
Snap231	0.00418437	0.535469	0.771	0.667	1	MK3
Rac22	2.97199e-05	0.533102	1	0.897	0.433197	MK3
Mrgpra2b	4.92779e-86	0.531866	0.4	0.006	7.18275e-82	MK3
Gpsm31	9.93048e-07	0.531853	0.914	0.597	0.0144747	MK3
Pkm1	9.99138e-08	0.530872	1	0.989	0.00145634	MK3
Glrx1	9.43584e-05	0.530559	0.571	0.357	1	MK3
Actg11	3.77168e-05	0.527348	1	1	0.549761	MK3
F13a11	2.02717e-05	0.526846	0.229	0.057	0.295481	MK3
Mgst2	2.75744e-39	0.524199	0.314	0.013	4.01924e-35	MK3
Cd442	0.000585083	0.522984	0.914	0.818	1	MK3
Ncf21	7.06516e-06	0.52288	0.886	0.558	0.102982	MK3
Cd300lf	2.86919e-33	0.517498	0.429	0.032	4.18213e-29	MK3
Fpr1	3.22008e-85	0.51743	0.371	0.005	4.69359e-81	MK3
Fcnb	8.63283e-34	0.513876	0.229	0.007	1.25832e-29	MK3
Serpinb1a	0.000606802	0.512622	0.971	0.813	1	MK3
Pnkp	1.81763e-05	0.512284	0.457	0.203	0.264938	MK3
Ptprc2	8.19438e-05	0.510239	0.971	0.754	1	MK3
Hacd41	0.000869758	0.506153	0.714	0.453	1	MK3
Glipr22	8.30293e-15	0.502657	0.4	0.064	1.21023e-10	MK3
Pram1	4.70239e-48	0.49629	0.429	0.02	6.8542e-44	MK3
AB1246111	2.27683e-13	0.494389	0.571	0.126	3.31871e-09	MK3
Pi161	8.13346e-18	0.490867	0.429	0.059	1.18553e-13	MK3
Sh2b3	8.36854e-09	0.48574	0.543	0.177	0.00012198	MK3
Gchfr1	0.00737993	0.485688	0.629	0.442	1	MK3
Pfkfb4	1.17756e-13	0.48308	0.371	0.062	1.71641e-09	MK3
Lgals32	2.31594e-07	0.481774	0.6	0.216	0.00337572	MK3
Coro1a2	3.70366e-06	0.481224	1	0.939	0.0539845	MK3
Cd74	8.83322e-69	2.61276	0.756	0.189	1.28753e-64	MK4
H2-Aa	2.74084e-72	1.92478	0.677	0.134	3.99504e-68	MK4
H2-Eb1	2.11574e-62	1.85367	0.713	0.177	3.08391e-58	MK4
Lyz2	4.34238e-15	1.81321	0.988	0.927	6.32946e-11	MK4
H2-Ab1	3.02303e-30	1.56935	0.811	0.437	4.40637e-26	MK4
Igkc	1.21234e-08	1.5321	0.244	0.111	0.000176711	MK4
S100a4	2.71487e-28	1.4378	0.305	0.065	3.9572e-24	MK4
Ighm	2.70241e-55	1.4255	0.451	0.074	3.93903e-51	MK4
Ifi27l2a	1.21086e-70	1.36893	0.561	0.089	1.76495e-66	MK4
Ly6c2	6.88368e-12	1.33657	0.22	0.074	1.00337e-07	MK4
Psap	6.57651e-26	1.33125	0.982	0.861	9.58592e-22	MK4
Ctss	4.52966e-73	1.10526	0.409	0.036	6.60243e-69	MK4
Fn1	2.42091e-16	1.07066	0.207	0.05	3.52871e-12	MK4
Chil3	0.000328298	1.05913	0.207	0.124	1	MK4
Cybb	2.45554e-43	1.01762	0.348	0.05	3.57919e-39	MK4
Irf8	1.15819e-56	1.01726	0.372	0.042	1.68818e-52	MK4
Vim	5.53269e-32	1.01349	0.884	0.43	8.06445e-28	MK4
S100a6	1.91331e-07	0.974745	0.39	0.269	0.00278884	MK4
F13a1	5.53885e-27	0.934471	0.244	0.041	8.07343e-23	MK4
Ms4a6c	1.1451e-18	0.926178	0.317	0.101	1.6691e-14	MK4
Ahnak	3.4763e-43	0.896541	0.305	0.037	5.06706e-39	MK4
Mpeg1	2.07424e-66	0.872682	0.372	0.032	3.02341e-62	MK4
Lsp1	5.48897e-22	0.84544	0.47	0.183	8.00073e-18	MK4
Ccr2	3.90897e-17	0.828705	0.323	0.106	5.69771e-13	MK4
Ctsh	2.41994e-62	0.827634	0.402	0.045	3.5273e-58	MK4
Lgals3	8.29827e-06	0.825768	0.335	0.212	0.120956	MK4
Lgals1	1.65466e-13	0.819781	0.329	0.128	2.41183e-09	MK4
Cd79a	1.64779e-28	0.817217	0.195	0.023	2.40181e-24	MK4
Wfdc17	2.27788e-23	0.718687	0.329	0.088	3.32024e-19	MK4
Plac8	1.14332e-29	0.716908	0.902	0.541	1.66651e-25	MK4
Tmsb10	2.76593e-19	0.705293	0.994	0.99	4.03162e-15	MK4
Cd52	2.57438e-33	0.695764	0.915	0.431	3.75241e-29	MK4
Pld4	1.43847e-62	0.659632	0.317	0.022	2.09672e-58	MK4
Atf3	1.03332e-14	0.658008	0.287	0.098	1.50617e-10	MK4
Cst3	1.58405e-14	0.656553	0.982	0.981	2.30891e-10	MK4
Ebf1	6.03918e-32	0.656125	0.159	0.01	8.80271e-28	MK4
Gm2a	2.28686e-19	0.654946	0.457	0.18	3.33333e-15	MK4
Pou2f2	3.99497e-39	0.652519	0.348	0.058	5.82307e-35	MK4
Klf2	2.50165e-17	0.650048	0.677	0.389	3.64641e-13	MK4
Ly86	3.10183e-82	0.623192	0.299	0.008	4.52123e-78	MK4
Tgfbi	5.10461e-08	0.60309	0.232	0.107	0.000744048	MK4
Ly6d	8.60827e-25	0.602519	0.152	0.015	1.25474e-20	MK4
Cd24a	7.37262e-08	0.599697	0.311	0.165	0.00107463	MK4
Ctsb	2.83801e-11	0.596323	0.848	0.652	4.13668e-07	MK4
Klf4	9.85037e-08	0.5814	0.348	0.204	0.00143579	MK4
Hp	7.47141e-09	0.576742	0.238	0.1	0.000108903	MK4
Unc93b1	4.01461e-16	0.557917	0.396	0.175	5.85169e-12	MK4
Ms4a4c	1.03885e-51	0.537858	0.207	0.008	1.51423e-47	MK4
Prtn3	1.24873e-05	0.529797	0.75	0.574	0.182015	MK4
Ramp1	0.00184796	0.519068	0.427	0.376	1	MK4
Coro1a	2.6114e-17	0.483036	0.976	0.936	3.80638e-13	MK4
Ccl3	1.91106e-220	4.17257	0.996	0.16	2.78556e-216	MK5
Ccl4	9.55425e-209	4.15716	0.984	0.174	1.39263e-204	MK5
Prss34	1.2e-93	3.84842	0.383	0.021	1.74912e-89	MK5
Mcpt8	4.64906e-207	3.7047	0.739	0.034	6.77647e-203	MK5
Ccl6	9.59857e-178	3.22502	0.822	0.103	1.39909e-173	MK5
Ccl9	4.68463e-233	3.04511	0.889	0.066	6.82831e-229	MK5
Ier3	5.7744e-149	2.93648	0.996	0.386	8.41677e-145	MK5
Lilr4b	1.97556e-252	2.90054	0.98	0.091	2.87958e-248	MK5
Hdc	4.83042e-269	2.88979	0.945	0.053	7.04081e-265	MK5
Osm	1.08457e-220	2.82542	0.937	0.11	1.58086e-216	MK5
Tyrobp	1.7011e-184	2.80954	1	0.262	2.47953e-180	MK5
Ifitm1	1.94339e-129	2.64823	1	0.707	2.83269e-125	MK5
Cyp11a1	9.1073e-305	2.54194	0.945	0.025	1.32748e-300	MK5
Junb	3.72015e-133	2.51067	1	0.803	5.42249e-129	MK5
Zfp36	6.7781e-126	2.50296	0.996	0.723	9.87975e-122	MK5
Csf2rb	6.74637e-271	2.46041	0.968	0.062	9.8335e-267	MK5
Egr1	6.34659e-117	2.44547	0.976	0.606	9.25079e-113	MK5
Csf1	2.28999e-250	2.39461	0.897	0.052	3.33788e-246	MK5
Cd69	2.18734e-130	2.3823	0.996	0.385	3.18826e-126	MK5
Fcer1a	1.19696e-265	2.33131	0.877	0.031	1.74469e-261	MK5
Nfkbiz	3.86133e-151	2.32545	0.893	0.223	5.62828e-147	MK5
Cd200r3	0	2.31687	0.929	0.014	0	MK5
Lcp1	9.25928e-179	2.3115	0.988	0.25	1.34963e-174	MK5
Cpa3	1.84448e-196	2.28406	0.751	0.046	2.68851e-192	MK5
Rgs2	1.71588e-123	2.26305	1	0.508	2.50107e-119	MK5
Neat1	3.77867e-135	2.22171	1	0.87	5.50779e-131	MK5
Gm12840	2.56268e-64	2.19578	0.399	0.06	3.73536e-60	MK5
Nfkbia	4.99008e-132	2.17107	0.996	0.596	7.27354e-128	MK5
Ier2	5.62131e-128	2.08012	1	0.838	8.19362e-124	MK5
Cyp4f18	1.6487e-263	2.04609	0.945	0.058	2.40315e-259	MK5
Dusp5	3.05587e-173	2.02713	0.767	0.079	4.45424e-169	MK5
Ms4a2	2.92567e-274	2.0013	0.87	0.023	4.26445e-270	MK5
Plac81	6.24467e-132	1.94294	1	0.502	9.10223e-128	MK5
Emilin2	8.25782e-153	1.86667	0.984	0.354	1.20366e-148	MK5
Tnfaip3	8.49685e-138	1.81799	0.755	0.13	1.2385e-133	MK5
Cebpb	3.18701e-109	1.78452	0.791	0.225	4.64538e-105	MK5
Ctsg	7.39962e-32	1.75392	0.257	0.049	1.07857e-27	MK5
Fcer1g1	1.47709e-128	1.7475	1	0.716	2.153e-124	MK5
Csrp3	6.85596e-126	1.72478	0.755	0.157	9.99325e-122	MK5
Btg1	3.60275e-115	1.72147	0.996	0.649	5.25136e-111	MK5
Gm20186	5.66445e-67	1.697	0.498	0.106	8.2565e-63	MK5
Cd531	7.43567e-184	1.6874	0.874	0.114	1.08382e-179	MK5
Id1	6.31647e-132	1.66471	0.593	0.051	9.20689e-128	MK5
Lgals31	2.02529e-166	1.6542	0.854	0.114	2.95207e-162	MK5
Alox5ap	1.39392e-120	1.62834	1	0.882	2.03177e-116	MK5
Emb1	2.62632e-154	1.62515	0.87	0.169	3.82813e-150	MK5
Pim11	4.32634e-94	1.60762	1	0.696	6.30608e-90	MK5
Il18rap	3.27302e-213	1.60715	0.787	0.045	4.77076e-209	MK5
Klf6	3.34972e-90	1.60456	1	0.683	4.88255e-86	MK5
Cd7	3.21451e-206	1.58051	0.66	0.013	4.68547e-202	MK5
Igsf6	6.2148e-195	1.56248	0.751	0.047	9.0587e-191	MK5
Cd63	1.91389e-125	1.54921	1	0.903	2.78968e-121	MK5
Syne1	7.18765e-110	1.52403	0.957	0.47	1.04767e-105	MK5
Il6	4.66438e-176	1.5225	0.577	0.012	6.7988e-172	MK5
Grina	1.64301e-116	1.52052	0.85	0.295	2.39485e-112	MK5
Fosb	7.98963e-40	1.49686	1	0.844	1.16457e-35	MK5
Fos1	3.18678e-44	1.49003	0.992	0.636	4.64505e-40	MK5
Csf2rb2	1.30483e-216	1.48314	0.715	0.021	1.90191e-212	MK5
Plk3	1.87e-98	1.48256	0.767	0.252	2.7257e-94	MK5
Ets1	5.26643e-105	1.47379	0.783	0.25	7.67635e-101	MK5
Rab44	1.00199e-191	1.4545	0.763	0.056	1.46049e-187	MK5
Gata2	2.0997e-123	1.44883	1	0.917	3.06053e-119	MK5
Stk17b1	6.87246e-103	1.44691	0.941	0.522	1.00173e-98	MK5
Cdh1	7.60391e-252	1.44674	0.767	0.011	1.10835e-247	MK5
Txnip	1.97924e-97	1.43922	0.988	0.755	2.88493e-93	MK5
Anxa1	1.4737e-106	1.43073	0.715	0.156	2.14806e-102	MK5
Plp2	5.28481e-115	1.43031	0.814	0.252	7.70314e-111	MK5
Btg2	1.99597e-75	1.41668	0.996	0.841	2.90933e-71	MK5
Cd521	1.18623e-115	1.41633	0.98	0.39	1.72905e-111	MK5
Hacd4	9.25241e-95	1.41179	0.85	0.391	1.34863e-90	MK5
Jun	6.42359e-113	1.41061	1	0.96	9.36302e-109	MK5
Cxcr2	1.08542e-155	1.40502	0.664	0.051	1.5821e-151	MK5
Limd21	1.60521e-106	1.39685	0.775	0.217	2.33976e-102	MK5
Il18r1	5.00654e-191	1.39059	0.704	0.036	7.29753e-187	MK5
Itgb71	1.29572e-171	1.38884	0.767	0.075	1.88864e-167	MK5
Lat2	2.66874e-91	1.37802	0.83	0.376	3.88995e-87	MK5
Fcgr3	2.25135e-156	1.37079	0.68	0.057	3.28157e-152	MK5
Sytl3	3.01562e-253	1.36971	0.751	0.008	4.39557e-249	MK5
Ncf1	1.23845e-111	1.36525	0.822	0.251	1.80517e-107	MK5
Ubc	1.82271e-105	1.35527	1	0.954	2.65678e-101	MK5
Ccr1	9.41529e-181	1.33777	0.711	0.046	1.37237e-176	MK5
Tmem71	4.75117e-163	1.33739	0.688	0.057	6.9253e-159	MK5
Dusp13	1.95792e-62	1.32431	1	0.692	2.85387e-58	MK5
Neurl3	3.55721e-78	1.3213	0.719	0.272	5.185e-74	MK5
Ncf2	4.08447e-111	1.32116	0.972	0.494	5.95352e-107	MK5
Slfn21	4.18323e-105	1.31337	0.656	0.118	6.09748e-101	MK5
Padi2	2.06813e-151	1.31056	0.708	0.08	3.01451e-147	MK5
Selplg1	7.44e-108	1.30551	0.866	0.341	1.08445e-103	MK5
Ptgs2	3.45372e-46	1.28359	0.332	0.058	5.03414e-42	MK5
Stx3	3.93871e-182	1.28133	0.676	0.035	5.74106e-178	MK5
Cebpa	1.79519e-155	1.27962	0.704	0.071	2.61667e-151	MK5
Hgf	3.13823e-96	1.27745	0.636	0.13	4.57429e-92	MK5
Nabp1	1.87752e-86	1.27125	0.613	0.138	2.73667e-82	MK5
Atp1b1	1.57557e-193	1.27047	0.636	0.015	2.29655e-189	MK5
Fxyd5	9.68328e-130	1.2627	1	0.995	1.41143e-125	MK5
S100a101	5.46705e-102	1.23193	1	0.863	7.96877e-98	MK5
Sat11	8.76146e-64	1.23074	0.866	0.513	1.27707e-59	MK5
H3f3b	2.99349e-113	1.22278	1	1	4.36331e-109	MK5
Hcst	3.71871e-101	1.2168	0.992	0.587	5.42039e-97	MK5
Mpc2	1.23732e-106	1.20568	1	0.904	1.80352e-102	MK5
Alox15	5.26643e-194	1.2035	0.617	0.011	7.67635e-190	MK5
Tecpr1	1.80515e-116	1.1957	0.644	0.097	2.63118e-112	MK5
Tbc1d4	2.42981e-71	1.1954	0.791	0.443	3.54169e-67	MK5
Man2b1	2.60773e-96	1.19522	1	0.732	3.80103e-92	MK5
Rgs1	7.53813e-53	1.18161	1	0.833	1.09876e-48	MK5
Alox5	1.76317e-68	1.17692	0.652	0.236	2.57e-64	MK5
Fam107b	1.65723e-93	1.17383	0.98	0.536	2.41558e-89	MK5
Lgals11	2.24896e-59	1.16959	0.462	0.093	3.27808e-55	MK5
Mxd1	7.4065e-39	1.15522	0.601	0.332	1.07957e-34	MK5
Vim1	4.60537e-89	1.1545	0.972	0.387	6.71279e-85	MK5
Dgat1	1.01341e-70	1.14842	0.597	0.171	1.47715e-66	MK5
Tgoln1	9.96788e-87	1.14177	0.949	0.572	1.45292e-82	MK5
Rac21	3.5139e-100	1.13465	1	0.882	5.12187e-96	MK5
Gsr	8.64985e-92	1.13108	0.988	0.597	1.2608e-87	MK5
Ctsd	1.27139e-106	1.12883	1	0.967	1.85317e-102	MK5
Pglyrp1	4.84396e-104	1.12763	0.632	0.102	7.06056e-100	MK5
Fam129a	9.50136e-84	1.12669	0.609	0.143	1.38492e-79	MK5
Pnrc1	5.06735e-79	1.10411	1	0.824	7.38617e-75	MK5
Gstm1	1.84409e-45	1.09514	0.494	0.167	2.68795e-41	MK5
Lilrb4a	7.43994e-136	1.08547	0.53	0.028	1.08445e-131	MK5
Ppp1r15a	2.79776e-48	1.07579	0.976	0.706	4.07802e-44	MK5
Slc7a8	1.82327e-110	1.07223	0.561	0.066	2.6576e-106	MK5
Coro1a1	7.25736e-103	1.06982	1	0.929	1.05783e-98	MK5
Trf	5.75018e-95	1.06827	0.628	0.127	8.38146e-91	MK5
Anxa21	3.94775e-82	1.06634	0.672	0.177	5.75424e-78	MK5
Iqgap11	2.88664e-104	1.05626	1	0.879	4.20756e-100	MK5
Ypel3	5.84896e-66	1.05162	0.664	0.243	8.52544e-62	MK5
Fam46a	4.99452e-41	1.0503	0.534	0.226	7.28001e-37	MK5
Galnt6	2.91719e-73	1.03958	0.625	0.185	4.2521e-69	MK5
Jund	1.67259e-93	1.03308	1	0.962	2.43797e-89	MK5
Anxa61	9.5977e-108	1.03088	0.636	0.102	1.39896e-103	MK5
AB124611	7.43925e-122	1.02904	0.589	0.057	1.08435e-117	MK5
Nlrp3	2.3202e-127	1.02836	0.51	0.029	3.38192e-123	MK5
Ikzf2	1.51864e-45	1.02019	0.601	0.296	2.21357e-41	MK5
Arl4c	2.20149e-70	1.01847	0.605	0.167	3.20889e-66	MK5
Spi11	5.91905e-66	1.01799	0.696	0.283	8.6276e-62	MK5
Aqp9	1.16209e-89	1.01342	0.577	0.107	1.69386e-85	MK5
Prr13	2.22087e-82	1.0118	0.992	0.645	3.23714e-78	MK5
Taldo11	6.15478e-110	1.01061	1	0.973	8.97121e-106	MK5
Ltb	2.26971e-64	1.00836	0.486	0.101	3.30834e-60	MK5
Cnn2	3.37051e-94	1.00754	1	0.857	4.91286e-90	MK5
Gpr183	1.07674e-138	1.00115	0.514	0.021	1.56945e-134	MK5
S100a11	4.25345e-67	1.00064	0.996	0.787	6.19983e-63	MK5
Hk2	3.11862e-42	0.997001	0.585	0.288	4.5457e-38	MK5
Gm2a1	1.20675e-70	0.995011	0.585	0.141	1.75896e-66	MK5
Ddit4	2.77838e-42	0.984081	0.466	0.152	4.04976e-38	MK5
Sell1	1.53828e-80	0.980043	0.589	0.123	2.2422e-76	MK5
Satb1	1.65298e-120	0.979746	0.597	0.064	2.40938e-116	MK5
Chst15	2.44305e-100	0.974047	0.545	0.07	3.56099e-96	MK5
Tnfaip8	1.02355e-67	0.973146	0.992	0.778	1.49192e-63	MK5
Mpo	0.00157893	0.972273	0.119	0.068	1	MK5
Srgn	6.51608e-117	0.970447	1	1	9.49784e-113	MK5
Igf1r	4.74488e-87	0.961827	1	0.846	6.91613e-83	MK5
Ccr21	2.12569e-91	0.960215	0.514	0.06	3.0984e-87	MK5
Ptms	1.57271e-71	0.953071	0.968	0.526	2.29239e-67	MK5
Lyst	1.35624e-40	0.952294	0.636	0.382	1.97685e-36	MK5
St8sia41	8.27103e-112	0.945566	0.534	0.049	1.20559e-107	MK5
Slc41a3	9.7438e-63	0.945548	0.542	0.148	1.42026e-58	MK5
Rin3	4.82518e-47	0.944172	0.704	0.428	7.03318e-43	MK5
Hk3	3.30835e-131	0.940709	0.565	0.041	4.82225e-127	MK5
Gpsm3	1.57921e-81	0.935219	0.945	0.545	2.30186e-77	MK5
Ier5	4.18356e-36	0.933256	0.96	0.761	6.09795e-32	MK5
Rnf130	1.74365e-73	0.932457	0.984	0.756	2.54154e-69	MK5
Ptpre	3.01394e-75	0.931335	1	0.841	4.39311e-71	MK5
Slc2a3	2.16856e-53	0.930464	0.972	0.597	3.1609e-49	MK5
2021-09-01	9.02281e-53	0.928324	0.526	0.167	1.31516e-48	MK5
Ssh2	4.20179e-46	0.926055	0.739	0.505	6.12453e-42	MK5
Cd244	1.989e-134	0.923002	0.542	0.032	2.89916e-130	MK5
Itgal	7.67145e-86	0.917928	0.53	0.084	1.11819e-81	MK5
Srsf5	1.10064e-101	0.917466	1	0.997	1.60429e-97	MK5
Retnlg	7.63535e-05	0.916175	0.146	0.302	1	MK5
Ms4a6b1	9.2591e-107	0.914895	0.478	0.036	1.34961e-102	MK5
Hvcn1	1.19399e-85	0.91451	0.538	0.09	1.74036e-81	MK5
Jak2	1.74016e-68	0.910439	0.953	0.623	2.53645e-64	MK5
Map4k4	3.15755e-57	0.906218	0.802	0.508	4.60244e-53	MK5
Ddx5	3.74906e-108	0.904147	1	1	5.46463e-104	MK5
Os9	5.04944e-65	0.902063	0.996	0.763	7.36006e-61	MK5
Sun2	3.79696e-43	0.899959	0.696	0.423	5.53444e-39	MK5
C3ar1	1.22955e-138	0.89709	0.435	0.005	1.79219e-134	MK5
Tulp4	4.06414e-109	0.896489	0.478	0.036	5.92389e-105	MK5
Il7r	1.40701e-120	0.896015	0.403	0.008	2.05086e-116	MK5
Leprotl1	1.61074e-68	0.893266	0.972	0.656	2.34782e-64	MK5
Pfkp	4.9383e-74	0.891847	0.945	0.549	7.19806e-70	MK5
Ankrd44	2.68527e-44	0.885172	0.593	0.275	3.91405e-40	MK5
Adam8	3.92115e-77	0.881607	0.443	0.059	5.71547e-73	MK5
Ly6e1	1.80057e-90	0.881432	1	0.992	2.62451e-86	MK5
Gsn	2.02758e-39	0.872887	0.628	0.354	2.9554e-35	MK5
Cd84	3.78575e-60	0.870547	0.984	0.674	5.51811e-56	MK5
Arhgap15	4.42746e-80	0.86899	0.992	0.608	6.45346e-76	MK5
Sorl11	1.86615e-86	0.868195	0.53	0.077	2.7201e-82	MK5
Actg1	6.08127e-106	0.863507	1	1	8.86406e-102	MK5
Tmsb4x	9.44294e-114	0.863136	1	0.999	1.3764e-109	MK5
Ap3s1	1.86824e-50	0.857074	0.818	0.533	2.72315e-46	MK5
Itgb2	1.68528e-35	0.856325	0.613	0.365	2.45646e-31	MK5
Nhsl2	3.91149e-103	0.844168	0.49	0.045	5.70139e-99	MK5
Map1lc3b	1.83781e-71	0.839029	1	0.917	2.6788e-67	MK5
Hip1r	1.71792e-40	0.835341	0.593	0.306	2.50405e-36	MK5
Tacstd2	1.2669e-72	0.833552	0.407	0.051	1.84664e-68	MK5
Ppp1r18	1.10384e-58	0.829801	0.573	0.182	1.60896e-54	MK5
Chd3	1.37016e-62	0.829623	0.478	0.098	1.99715e-58	MK5
Napsa1	3.96485e-50	0.828364	1	0.639	5.77917e-46	MK5
Itm2b	1.32905e-113	0.826644	1	1	1.93723e-109	MK5
Ftl11	7.9711e-92	0.818144	1	1	1.16187e-87	MK5
Prkcd	1.33559e-32	0.817768	0.597	0.379	1.94676e-28	MK5
Hist1h1c	5.11114e-37	0.815793	0.996	0.721	7.44999e-33	MK5
Cotl11	9.62385e-72	0.814102	1	0.87	1.40277e-67	MK5
Msn1	9.07026e-64	0.806964	1	0.812	1.32208e-59	MK5
Gng2	5.76239e-38	0.80207	0.518	0.224	8.39926e-34	MK5
Cxcr4	1.01761e-21	0.801055	0.478	0.289	1.48326e-17	MK5
Mcl11	4.02794e-55	0.795429	1	0.936	5.87113e-51	MK5
Esyt1	9.57842e-63	0.793297	0.949	0.583	1.39615e-58	MK5
Pnpla7	2.53122e-30	0.792253	0.494	0.247	3.6895e-26	MK5
Tec	1.92622e-29	0.778639	0.526	0.289	2.80766e-25	MK5
Rassf3	2.85955e-30	0.776848	0.502	0.249	4.16808e-26	MK5
Zc3h12a	9.22888e-29	0.774711	0.451	0.204	1.3452e-24	MK5
Lmo4	7.24958e-44	0.772419	0.957	0.587	1.0567e-39	MK5
Scp2	3.53596e-55	0.7724	1	0.942	5.15401e-51	MK5
Skap1	2.26042e-134	0.772196	0.415	0.003	3.29478e-130	MK5
Myl12b	5.40286e-76	0.769118	1	0.963	7.87521e-72	MK5
Shisa51	3.50234e-53	0.767393	0.87	0.453	5.10501e-49	MK5
Arhgdib1	6.93129e-84	0.76382	1	0.979	1.0103e-79	MK5
Rcsd11	1.13567e-67	0.763428	0.451	0.075	1.65536e-63	MK5
Myh9	6.54944e-78	0.761272	1	0.991	9.54647e-74	MK5
Coq8b	1.05408e-35	0.760022	0.486	0.203	1.53643e-31	MK5
Itgam1	4.37399e-65	0.758686	0.435	0.068	6.37553e-61	MK5
Arhgap301	3.14239e-52	0.758648	0.866	0.519	4.58035e-48	MK5
Myo1f	3.24578e-59	0.758347	0.51	0.126	4.73105e-55	MK5
Arhgap45	2.04955e-58	0.753529	1	0.875	2.98743e-54	MK5
Klf5	1.2694e-60	0.750031	0.391	0.06	1.85027e-56	MK5
Rps6ka3	5.66276e-35	0.746621	0.735	0.507	8.25404e-31	MK5
Il3ra	6.76683e-29	0.745975	0.451	0.204	9.86333e-25	MK5
Cytip	6.38083e-22	0.745836	0.49	0.3	9.30069e-18	MK5
Arpc5	6.56861e-70	0.745389	1	0.961	9.57441e-66	MK5
Notch1	3.51201e-60	0.744528	0.494	0.117	5.11911e-56	MK5
Ubb	5.74701e-78	0.744217	1	1	8.37684e-74	MK5
Mboat1	4.01059e-71	0.740675	0.439	0.066	5.84584e-67	MK5
Vasp	4.79527e-63	0.739613	1	0.939	6.98959e-59	MK5
Atp8b4	3.63922e-85	0.739218	0.415	0.038	5.30452e-81	MK5
Dock101	6.02291e-30	0.733664	0.668	0.482	8.779e-26	MK5
Crip11	1.86819e-51	0.733527	1	0.993	2.72308e-47	MK5
Tespa1	2.58135e-92	0.730394	0.427	0.034	3.76257e-88	MK5
Cd200r1	3.27354e-76	0.729538	0.435	0.057	4.77151e-72	MK5
Jak1	8.63562e-59	0.729031	1	0.888	1.25873e-54	MK5
Vsir	1.12455e-36	0.727937	0.526	0.228	1.63914e-32	MK5
Arap3	2.9281e-42	0.727448	0.462	0.149	4.26799e-38	MK5
Arf4	3.10091e-41	0.725486	1	0.927	4.51988e-37	MK5
Ppp3ca	4.19604e-48	0.720688	0.992	0.741	6.11615e-44	MK5
Ppp1r10	1.15675e-43	0.717919	0.937	0.619	1.68608e-39	MK5
Nfil3	8.10329e-80	0.717316	0.407	0.04	1.18114e-75	MK5
Atp6v0b	2.6301e-55	0.715403	0.992	0.856	3.83364e-51	MK5
Tspo1	5.34278e-77	0.713764	1	0.981	7.78764e-73	MK5
Dnajb1	1.11213e-09	0.713214	0.96	0.791	1.62103e-05	MK5
Laptm51	5.9722e-75	0.710175	1	0.977	8.70507e-71	MK5
Tax1bp1	1.91054e-77	0.707694	1	0.987	2.7848e-73	MK5
Prkacb	5.52181e-48	0.707044	0.996	0.79	8.04859e-44	MK5
Arhgap9	6.08586e-25	0.706149	0.474	0.258	8.87075e-21	MK5
Arhgef1	5.16004e-42	0.70543	0.98	0.706	7.52128e-38	MK5
Trib1	3.17476e-28	0.701949	0.304	0.083	4.62752e-24	MK5
Tcp11l2	1.16183e-38	0.701714	0.431	0.136	1.69348e-34	MK5
Dock21	4.8633e-49	0.699268	0.949	0.568	7.08875e-45	MK5
Klf7	1.2963e-35	0.697746	0.794	0.532	1.88948e-31	MK5
Furin	4.3885e-16	0.697262	0.557	0.469	6.39668e-12	MK5
Sh3bgrl31	1.52621e-88	0.696883	1	0.998	2.22461e-84	MK5
Herc1	7.36849e-42	0.692372	0.984	0.83	1.07403e-37	MK5
Fes	1.51166e-40	0.690609	0.822	0.515	2.20339e-36	MK5
2310001H17Rik	2.94826e-38	0.690422	0.462	0.164	4.29738e-34	MK5
Chka	1.71589e-07	0.688379	0.953	0.695	0.00250108	MK5
Nedd9	5.76296e-60	0.680836	0.411	0.071	8.40009e-56	MK5
Pygl	2.05316e-21	0.679082	0.545	0.385	2.99268e-17	MK5
Nfam1	3.47639e-24	0.677854	0.47	0.248	5.06719e-20	MK5
Itk	4.90453e-106	0.674811	0.379	0.012	7.14885e-102	MK5
Faah	1.94807e-51	0.673745	0.415	0.09	2.8395e-47	MK5
Gabbr1	8.10072e-34	0.67252	0.423	0.154	1.18076e-29	MK5
Irf1	5.99317e-08	0.671763	0.285	0.182	0.000873565	MK5
Gabarap	5.87131e-67	0.671562	1	0.969	8.55802e-63	MK5
Il17ra1	1.90358e-48	0.670395	0.941	0.626	2.77466e-44	MK5
Snx201	5.03749e-36	0.670312	0.435	0.146	7.34264e-32	MK5
Itm2c	4.1368e-36	0.668293	0.818	0.568	6.0298e-32	MK5
Ikzf11	2.33371e-41	0.665053	0.854	0.524	3.40162e-37	MK5
Lbr	2.85864e-49	0.664652	1	0.879	4.16675e-45	MK5
D830025C05Rik	6.64153e-50	0.664153	0.383	0.077	9.68069e-46	MK5
Myo1d	3.19583e-67	0.659973	0.383	0.048	4.65825e-63	MK5
Ostf1	1.55312e-57	0.659689	1	0.888	2.26383e-53	MK5
Malat1	3.57215e-66	0.657553	1	1	5.20677e-62	MK5
Casp3	1.12326e-36	0.655901	0.905	0.593	1.63727e-32	MK5
Zc3hav1	2.25857e-41	0.655285	0.937	0.591	3.29209e-37	MK5
Trim12a	5.69792e-14	0.653013	0.427	0.297	8.30529e-10	MK5
Flot1	2.35227e-16	0.652596	0.494	0.384	3.42867e-12	MK5
Sema4a1	1.49048e-60	0.650949	0.364	0.047	2.17252e-56	MK5
C5ar1	3.92865e-60	0.650229	0.312	0.03	5.72641e-56	MK5
Npc21	3.08913e-57	0.650096	1	0.868	4.50271e-53	MK5
Dok3	1.87579e-49	0.649201	0.391	0.078	2.73415e-45	MK5
Pstpip1	5.26334e-26	0.648203	0.458	0.225	7.67184e-22	MK5
Apbb1ip1	1.16446e-42	0.643874	0.921	0.608	1.69731e-38	MK5
Rps6ka1	1.35909e-46	0.642514	0.953	0.605	1.98101e-42	MK5
Il1rl1	7.92667e-92	0.640557	0.324	0.009	1.15539e-87	MK5
Gmfg	5.07095e-69	0.639247	1	0.99	7.39142e-65	MK5
Vopp1	9.04851e-29	0.638335	0.407	0.161	1.31891e-24	MK5
P2rx4	7.68461e-23	0.635946	0.439	0.221	1.12011e-18	MK5
Gng12	7.81561e-30	0.635688	1	0.741	1.1392e-25	MK5
Grm6	1.88719e-106	0.63561	0.336	0.003	2.75077e-102	MK5
H2-T231	2.55325e-48	0.634692	0.996	0.775	3.72161e-44	MK5
1700017B05Rik	5.41631e-19	0.634286	0.573	0.442	7.89481e-15	MK5
Fcgr2b	3.71399e-29	0.630979	0.379	0.132	5.41351e-25	MK5
Ppp2r5a	1.43902e-43	0.630462	0.98	0.851	2.09751e-39	MK5
Cd821	1.47574e-62	0.629702	0.383	0.053	2.15104e-58	MK5
Litaf	1.44598e-14	0.627394	0.506	0.411	2.10766e-10	MK5
Prex1	9.20364e-17	0.626266	0.458	0.301	1.34152e-12	MK5
Itga1	3.64515e-76	0.624439	0.316	0.017	5.31317e-72	MK5
Pbxip1	1.21139e-14	0.622803	0.482	0.37	1.76573e-10	MK5
Abr	2.03573e-21	0.620113	0.411	0.208	2.96728e-17	MK5
Gm26802	2.32789e-07	0.618963	0.249	0.143	0.00339314	MK5
Dusp6	1.89232e-11	0.618509	0.344	0.21	2.75824e-07	MK5
H2-D11	6.34494e-78	0.616389	1	1	9.24839e-74	MK5
Samsn1	1.20673e-39	0.615127	0.988	0.711	1.75893e-35	MK5
Lsp11	1.18419e-29	0.613143	0.451	0.169	1.72608e-25	MK5
Gab2	1.46566e-26	0.612048	0.427	0.191	2.13635e-22	MK5
Cebpd	1.57386e-34	0.611956	0.372	0.101	2.29405e-30	MK5
Adipor11	4.14868e-42	0.60956	0.98	0.642	6.04712e-38	MK5
Akap13	1.49987e-49	0.609173	1	0.944	2.18621e-45	MK5
Kctd121	3.9175e-14	0.608565	0.822	0.574	5.71015e-10	MK5
Cd371	3.83898e-40	0.604588	0.972	0.67	5.59569e-36	MK5
Rab21	6.58814e-39	0.603807	0.984	0.701	9.60288e-35	MK5
Ccpg1	2.24003e-24	0.603536	0.447	0.223	3.26507e-20	MK5
Stk10	1.84345e-13	0.603098	0.455	0.339	2.68701e-09	MK5
Wdr95	6.50141e-82	0.602391	0.265	0.003	9.47646e-78	MK5
Arpc1b	2.92979e-75	0.601875	1	0.995	4.27046e-71	MK5
Dlst	5.06842e-36	0.601525	0.996	0.827	7.38773e-32	MK5
Ankrd12	1.51194e-30	0.600964	0.992	0.763	2.2038e-26	MK5
Cast	2.45913e-37	0.598745	0.889	0.611	3.58443e-33	MK5
Gpr34	9.97884e-93	0.595905	0.292	0.003	1.45452e-88	MK5
Fosl2	1.24789e-29	0.595457	0.375	0.125	1.81892e-25	MK5
Mirt1	1.2365e-73	0.595024	0.348	0.028	1.80232e-69	MK5
Atp11b	1.27572e-32	0.588877	0.988	0.841	1.85949e-28	MK5
Smim3	1.35553e-16	0.58713	0.443	0.284	1.97582e-12	MK5
Kif21b	1.38258e-16	0.5867	0.474	0.332	2.01524e-12	MK5
Actb1	3.05918e-93	0.58517	1	1	4.45907e-89	MK5
Nbeal2	1.46863e-14	0.584876	0.526	0.441	2.14067e-10	MK5
L1cam	5.39323e-69	0.584799	0.285	0.015	7.86117e-65	MK5
Osbpl5	3.49151e-84	0.583166	0.34	0.018	5.08923e-80	MK5
Egr3	1.53358e-10	0.581771	0.186	0.073	2.23534e-06	MK5
Tapbp1	1.76805e-39	0.579656	0.996	0.696	2.57712e-35	MK5
Tbc1d10c	1.01348e-16	0.577657	0.415	0.246	1.47724e-12	MK5
Tnfaip8l2	4.46139e-24	0.573192	0.423	0.193	6.50292e-20	MK5
Apobr	1.1344e-51	0.572481	0.3	0.036	1.6535e-47	MK5
Ms4a6c1	1.70491e-44	0.571736	0.383	0.077	2.48508e-40	MK5
Mapkapk3	1.83482e-39	0.570411	0.933	0.616	2.67444e-35	MK5
Gpi1	7.78713e-54	0.569502	1	0.987	1.13505e-49	MK5
Gpx11	1.08259e-55	0.566031	1	1	1.57799e-51	MK5
Rasal3	7.36352e-15	0.564903	0.522	0.414	1.07331e-10	MK5
Gzmb	4.79992e-33	0.564192	0.111	0.002	6.99637e-29	MK5
Fyb	4.06146e-52	0.561795	1	0.981	5.91999e-48	MK5
Ube2d3	7.95862e-47	0.559973	1	0.998	1.16005e-42	MK5
Adgre5	4.14032e-12	0.558241	0.435	0.321	6.03493e-08	MK5
Oxr1	6.34419e-12	0.557785	0.526	0.471	9.24729e-08	MK5
Arhgap4	5.32195e-19	0.557592	0.395	0.203	7.75727e-15	MK5
Tpm4	3.59164e-38	0.556728	0.889	0.552	5.23518e-34	MK5
Nedd4	3.08832e-49	0.553133	1	0.997	4.50154e-45	MK5
Ptprc1	3.10761e-26	0.550749	0.98	0.72	4.52965e-22	MK5
Gimap1	3.01149e-31	0.550501	0.96	0.704	4.38955e-27	MK5
Rnase12	1.02215e-62	0.549952	0.237	0.009	1.48989e-58	MK5
Dnajb9	1.88713e-05	0.548861	0.415	0.402	0.275068	MK5
Ccdc88b	1.18091e-11	0.547236	0.458	0.37	1.72129e-07	MK5
Cyba1	6.53476e-48	0.546569	1	0.958	9.52507e-44	MK5
Nfkbid	1.02861e-08	0.546006	0.249	0.136	0.00014993	MK5
Trim12c	1.84395e-11	0.54573	0.47	0.364	2.68774e-07	MK5
Plec1	4.59742e-29	0.544123	0.838	0.548	6.7012e-25	MK5
Clk1	2.48733e-28	0.54389	1	0.901	3.62554e-24	MK5
4833407H14Rik	1.72946e-78	0.540931	0.304	0.013	2.52087e-74	MK5
Tmcc3	2.05623e-54	0.540229	0.304	0.035	2.99715e-50	MK5
Fau	4.94859e-111	0.54019	1	1	7.21307e-107	MK5
Pecam1	2.3562e-38	0.539407	0.96	0.605	3.43439e-34	MK5
Abtb1	8.53766e-11	0.538782	0.403	0.303	1.24445e-06	MK5
Id21	1.84759e-17	0.535872	0.225	0.068	2.69305e-13	MK5
Perp	2.4658e-72	0.535126	0.245	0.005	3.59416e-68	MK5
Sh3kbp1	3.66757e-11	0.531486	0.439	0.343	5.34586e-07	MK5
Gm26740	3.0662e-51	0.529255	0.292	0.034	4.46929e-47	MK5
Taf7	3.82685e-13	0.528342	0.585	0.533	5.57801e-09	MK5
AY036118	8.65438e-39	0.526148	1	0.879	1.26146e-34	MK5
Ube2h	8.69655e-18	0.525867	0.399	0.22	1.26761e-13	MK5
Clec12a1	9.88909e-17	0.525728	0.198	0.055	1.44143e-12	MK5
Arrb2	2.19223e-27	0.525376	0.988	0.796	3.19539e-23	MK5
Rb1cc1	2.00632e-25	0.524936	0.98	0.735	2.92442e-21	MK5
Acod1	1.34222e-26	0.523068	0.178	0.025	1.95642e-22	MK5
Dmxl2	1.31247e-23	0.522784	0.296	0.095	1.91305e-19	MK5
Slc18a2	5.95245e-13	0.522169	0.593	0.494	8.67629e-09	MK5
Ptpn18	2.48272e-50	0.521314	1	0.982	3.61881e-46	MK5
Ero1l	3.28515e-09	0.519318	0.435	0.374	4.78844e-05	MK5
Tmcc1	0.000182596	0.519174	0.387	0.383	1	MK5
Prkd3	6.43276e-07	0.515553	0.411	0.376	0.00937639	MK5
Add1	2.50053e-32	0.513459	0.957	0.711	3.64477e-28	MK5
Mapk14	9.30159e-19	0.510828	0.992	0.911	1.3558e-14	MK5
Gm20342	0.000242735	0.510785	0.364	0.352	1	MK5
Pik3cd	7.34375e-16	0.510503	0.538	0.4	1.07042e-11	MK5
Igfbp7	1.11728e-49	0.510352	0.241	0.02	1.62855e-45	MK5
Samhd11	2.25553e-25	0.508168	0.893	0.559	3.28766e-21	MK5
Gm26532	4.35967e-07	0.505585	0.32	0.224	0.00635465	MK5
Crlf3	6.01816e-25	0.504055	0.984	0.863	8.77206e-21	MK5
Il4	1.91014e-84	0.500373	0.289	0.006	2.78422e-80	MK5
Atp13a3	2.00241e-07	0.498831	0.324	0.233	0.00291871	MK5
Atp6v1b2	1.24061e-09	0.498757	0.538	0.492	1.80831e-05	MK5
H2-Oa	5.88926e-23	0.498102	0.265	0.075	8.58419e-19	MK5
Gadd45a	1.29577e-15	0.497888	0.292	0.123	1.88871e-11	MK5
Pfdn5	5.40215e-53	0.497006	1	0.999	7.87417e-49	MK5
Tle3	7.02401e-10	0.495394	0.383	0.278	1.02382e-05	MK5
Ddx3x	2.13307e-26	0.494217	1	0.975	3.10917e-22	MK5
Ugcg	8.64354e-10	0.492096	0.522	0.477	1.25988e-05	MK5
Phf20l1	5.92331e-21	0.491044	0.976	0.802	8.63381e-17	MK5
Rab19	4.84789e-74	0.490147	0.265	0.008	7.06629e-70	MK5
Mark2	1.59878e-23	0.490003	0.976	0.788	2.33038e-19	MK5
Fam49b	3.15478e-28	0.485105	0.992	0.794	4.59841e-24	MK5
Ppp1r11	2.03868e-20	0.483275	0.992	0.791	2.97158e-16	MK5
Mettl7a1	8.80284e-36	0.482558	0.312	0.068	1.2831e-31	MK5
