# Supplementary material for: CXCR4high megakaryocytes regulate host-defense immunity against bacterial pathogens
Source: eLife. 2022 Jul 29;11:e78662. doi: 10.7554/eLife.78662 (PMC9374440; doi:10.7554/eLife.78662)
Supplement: Figure 1—source data 2. [file elife-78662-fig1-data2.xlsx]

## Sheet: Means by CellphoneDB
means
interacting_pair	MK1.B	MK1.T	MK1.DC	MK1.MP	MK1.Mon	MK1.Neu	MK1.MF	MK2.B	MK2.T	MK2.DC	MK2.MP	MK2.Mon	MK2.Neu	MK2.MF	MK3.B	MK3.T	MK3.DC	MK3.MP	MK3.Mon	MK3.Neu	MK3.MF	MK4.B	MK4.T	MK4.DC	MK4.MP	MK4.Mon	MK4.Neu	MK4.MF	MK5.B	MK5.T	MK5.DC	MK5.MP	MK5.Mon	MK5.Neu	MK5.MF
CCL3_CCR1	0.062	0.062	0.077	0.167	0.166	0.936	0	0.07	0.07	0.085	0.175	0.174	0.944	0	0.204	0.204	0.219	0.309	0.308	1.078	0	0.309	0.309	0.324	0.415	0.413	1.184	0	2.411	2.411	2.426	2.516	2.515	3.285	0
CCL3_CCR3	0.024	0	0	0	0.027	0.029	0.252	0.032	0	0	0	0.036	0.037	0.26	0.166	0	0	0	0.17	0.172	0.394	0.271	0	0	0	0.275	0.277	0.5	2.373	0	0	0	2.377	2.379	2.601
CCL3_CCR5	0.028	0.168	0.171	0	0.096	0.025	0.44	0.036	0.176	0.179	0	0.104	0.033	0.448	0.17	0.31	0.313	0	0.238	0.167	0.582	0.275	0.415	0.418	0	0.344	0.272	0.687	2.377	2.517	2.52	0	2.445	2.374	2.789
CCL3_IDE	0.056	0	0.08	0.095	0.097	0.027	0.255	0.064	0	0.088	0.103	0.105	0.035	0.266	0.198	0	0.222	0.238	0.239	0.169	0.4	0.303	0	0.327	0.343	0.344	0.275	0.467	2.405	0	2.429	2.445	2.446	2.376	2.545
CCL4_CCR5	0.031	0.171	0.173	0	0.099	0.028	1.421	0.042	0.182	0.184	0	0.11	0.039	1.432	0.176	0.316	0.319	0	0.244	0.173	1.567	0.243	0.383	0.386	0	0.312	0.24	1.634	2.321	2.461	2.464	0	2.389	2.318	3.712
CCL4_CNR2	0.097	0.047	0.031	0.057	0.062	0.097	0.234	0.108	0.058	0.042	0.068	0.073	0.108	0.245	0.243	0.193	0.176	0.203	0.208	0.242	0.379	0.31	0.26	0.243	0.27	0.275	0.309	0.446	2.388	2.338	2.321	2.348	2.352	2.387	2.524
CCL4_SLC7A1	0.142	0.156	0.15	0.073	0.109	0.035	0	0.153	0.167	0.161	0.084	0.12	0.046	0	0.288	0.301	0.295	0.219	0.254	0.18	0	0.355	0.368	0.362	0.286	0.321	0.247	0	2.433	2.446	2.44	2.363	2.399	2.325	0
CXCL10_DPP4	0.115	0.046	0.19	0.004	0.086	0.004	0.522	0.114	0.045	0.189	0.004	0.085	0.004	0.523	0.16	0.091	0.235	0.049	0.131	0.049	0.579	0.163	0.094	0.239	0.053	0.134	0.053	0.524	0.123	0.054	0.198	0.013	0.094	0.013	0
CXCL12_CXCR3	0.003	0.309	0.067	0	0.009	0.005	0	0.004	0.31	0.068	0	0.01	0.007	0	0.06	0.366	0.124	0	0.066	0.063	0	0.005	0.311	0.069	0	0.011	0.007	0	0	0	0	0	0	0	0
IL15_IL15 receptor	0.021	0.232	0	0.021	0.021	0	0	0.025	0.236	0	0.025	0.025	0	0	0.04	0.252	0	0.04	0.04	0	0	0.024	0.236	0	0.024	0.024	0	0	0.173	0.384	0	0.173	0.172	0	0
IL15_IL15RA	0.048	0	0.044	0.072	0.09	0.153	3.666	0.062	0	0.058	0.086	0.104	0.167	3.67	0.04	0	0.036	0.065	0.082	0.146	3.685	0.023	0	0.019	0.048	0.066	0.129	3.669	0.013	0	0.009	0.038	0.055	0.119	3.818
IL4_IL13 receptor	0.007	0	0.093	0.004	0.134	0.209	3.688	0.008	0	0.093	0.005	0.134	0.21	3.688	0.017	0	0.102	0.014	0.143	0.219	3.697	0.019	0	0.104	0.016	0.146	0.221	3.7	0.197	0	0.282	0.194	0.323	0.399	3.877
IL4_IL4 receptor	0.224	0.206	0.074	0.044	0.112	0.015	0.209	0.224	0.207	0.074	0.044	0.113	0.016	0.209	0.234	0.216	0.084	0.054	0.122	0.025	0.218	0.236	0.218	0.086	0.056	0.124	0.027	0.221	0.414	0.396	0.264	0.234	0.302	0.205	0.398
IL6_IL6 receptor	0.022	0.061	0.254	0.005	0.163	0.002	2.855	0.023	0.062	0.255	0.006	0.164	0.003	2.856	0	0	0	0	0	0	0	0.063	0.102	0.295	0.046	0.204	0.044	2.896	0.555	0.593	0.786	0.537	0.695	0.535	3.387
pvalue
interacting_pair	MK1.B	MK1.T	MK1.DC	MK1.MP	MK1.Mon	MK1.Neu	MK1.MF	MK2.B	MK2.T	MK2.DC	MK2.MP	MK2.Mon	MK2.Neu	MK2.MF	MK3.B	MK3.T	MK3.DC	MK3.MP	MK3.Mon	MK3.Neu	MK3.MF	MK4.B	MK4.T	MK4.DC	MK4.MP	MK4.Mon	MK4.Neu	MK4.MF	MK5.B	MK5.T	MK5.DC	MK5.MP	MK5.Mon	MK5.Neu	MK5.MF
CCL3_CCR1	1	1	1	1	1	0	1	1	1	1	1	1	0	1	1	1	1	1	1	0	1	1	1	1	1	1	0	1	1	1	1	0	0	0	1
CCL3_CCR3	1	1	1	1	1	1	1	1	1	1	1	1	1	1	1	1	1	1	1	1	1	1	1	1	1	1	1	1	1	1	1	1	1	1	1
CCL3_CCR5	1	0.579	0.921	1	1	1	0.159	1	0.579	0.921	1	1	1	0.159	1	0.331	0.52	1	0.753	1	0.107	1	0.141	0.079	1	0.453	1	0.095	1	0	0	1	0	1	0
CCL3_IDE	1	1	1	1	1	1	0.159	1	1	1	1	1	1	0.159	1	1	0.891	0.907	0.891	1	0.119	1	1	0.953	0.891	0.937	1	0.099	1	1	0	0	0	1	0
CCL4_CCR5	1	0.579	0.921	1	1	1	1	1	0.579	0.921	1	1	1	1	1	0.14	0.219	1	0.486	1	1	1	0	0	1	0.125	1	1	1	0	0	1	0	1	1
CCL4_CNR2	1	1	1	1	1	1	0	1	1	1	1	1	1	0	0.579	1	1	0.778	0.766	0.579	0.004	0.359	1	1	0.767	0.771	0.375	0	0	1	1	0	0	0	0
CCL4_SLC7A1	1	1	1	1	1	1	1	1	1	1	1	1	1	1	0.502	0.565	0.484	0.794	0.657	1	0.659	0.233	0.249	0.203	0.753	0.483	1	0.487	0	0	0	0	0	1	0
CXCL10_DPP4	1	1	1	1	1	1	1	1	1	1	1	1	1	1	1	1	1	1	1	1	0	1	1	1	1	1	1	1	1	1	1	1	1	1	1
CXCL12_CXCR3	1	1	1	1	1	1	1	1	1	1	1	1	1	1	1	0	0	1	1	1	1	1	1	1	1	1	1	1	1	1	1	1	1	1	1
IL15_IL15 receptor	1	1	1	1	1	1	1	1	1	1	1	1	1	1	1	1	1	1	1	1	1	1	1	1	1	1	1	1	1	1	1	1	1	1	0
IL15_IL15RA	1	1	1	1	1	1	1	1	1	1	1	1	1	1	1	1	1	0.785	1	1	1	1	1	1	1	1	1	1	1	1	1	0	1	1	0
IL4_IL13 receptor	1	1	1	1	1	1	1	1	1	1	1	1	1	1	1	1	1	1	1	1	1	1	1	1	1	1	1	1	1	1	0	1	0	0	1
IL4_IL4 receptor	1	1	1	1	1	1	1	1	1	1	1	1	1	1	1	1	1	1	1	1	1	1	1	1	1	1	1	1	0	0	0	0	0	1	1
IL6_IL6 receptor	1	1	1	1	1	1	1	1	1	1	1	1	1	1	1	1	1	1	1	1	1	1	1	1	1	1	1	1	1	0	0	1	0	1	1
