# Supplementary material for: CXCR4high megakaryocytes regulate host-defense immunity against bacterial pathogens
Source: eLife. 2022 Jul 29;11:e78662. doi: 10.7554/eLife.78662 (PMC9374440; doi:10.7554/eLife.78662)
Supplement: Figure 2—source data 1. [file elife-78662-fig2-data1.xlsx]

## Sheet: Sheet1
Infection
	Actual
	CXCR4lowMK	CXCR4highMK
	28.7	3.33
	50.7	0
	31.8	0
	11.8	12
	0	17.8
	59.6	18
	12.3	15.2
	25.4	9.45
	25.2	0
	36.4	2.21
	0	47.3
	2.9	42.9
	14.3	0
	9.22	3.15
	17.2	8.97
	19.4	10.4
	28.9	39.9
	52.1	0
	19.8	11.3
	21.5	12.4
	10.9	45.7
	17.6	5.68
	4.96	17.6
	27.5	9.76
	12.4	0
	35.6	0
	31	2.02
	28.3	3.75
	15.2	3.18
	27.1	8.25
	30.4	31.3
	5.53	14.2
	6.7	27.6
	68.9	45.3
	34.4	28
	28.4	24.5
	19.2	23.7
	12	14.6
	21.2	26.4
	20.6	14.9
	50.8	11.7
	6.99	44.5
	23.7	27.6
	35.6	0
	36	4.62
	30.8	43.2
	31.9	32.3
	18.9	15.5
	42.4	26.3
	17.6	8.32
	6.5	14.1
	13.4	7.21
	25.4	15.3
	28.4	17.6
	30.1	16.5
	9.6	0
	0	7.32
	13.9	31.5
	29	15.4
	39.8	0
	35.6	38.3
	11.8	16
	39	0
	58.3	0
	45	21.5
	0	18.6
	15.9	15.2
	11.8	9.64
	95.7	0
	69.5	31.4
	57.3	10.2
	9.65	3.45
	35.6	20.8
	0	23.7
	20.5	0
	19.6	13.1
	92.8	51.6
	43.8	32.1
	12.1	3.45
	6.77	2.35
	3.41	8.51
	21.4	12.9
	3.45	27.6
	18.4	5.21
	34.1	0
