# Supplementary material for: CXCR4high megakaryocytes regulate host-defense immunity against bacterial pathogens
Source: eLife. 2022 Jul 29;11:e78662. doi: 10.7554/eLife.78662 (PMC9374440; doi:10.7554/eLife.78662)
Supplement: Figure 2—source data 2. [file elife-78662-fig2-data2.xlsx]

## Sheet: Sheet1
Infection
	Random
	CXCR4_low_MK	CXCR4_high_MK
	92.3262	378.458
	237.76	93.5
	0	313.191
	86.2694	447.928
	221.393	190.355
	0	166.462
	219.117	193.592
	206.021	86.0268
	101.086	133.504
	30.621	268.565
	197.562	314.487
	330.069	257.986
	22.1982	304.363
	87.1939	329.852
	106.349	339.648
	48.9296	699.569
	0	231.519
	116.5	341.862
	206.5	192.118
	192.651	610.324
	202.5	506.122
	104.519	407.624
	76.8095	62.5692
	31.8657	150.055
	252.157	257.961
	233.502	0
	3.33095	144.592
	105.874	173.025
	285.337	262.094
	54.1127	196.48
	0	778.272
	83.5523	120.113
	63.8099	309.067
	317.645	324.685
	123.043	729.11
	91.6488	259.158
	67.7282	328.228
	116.567	662.906
	14.5	316.84
	291.565	0
	223.23	619.349
	113.539	191.956
	132.574	521.49
	0	348.99
	268.565	0
	261.237	24.3328
	268.192	679.867
	84.5	221.788
	20.061	327.374
	273.132	211.1
	86.9036	338.328
	424.061	348.99
	37.8113	172.122
	103.674	69.0542
	46.6935	43.5
	41.9072	228.706
	18.7132	210.103
	129.155	80.4759
	0	278.131
	199.589	90.1553
	92.5211	707.752
	0	55.9209
	21.6868	190.552
	26.7062	447.972
	306.688	24.3701
	89.1788	689.758
	16.605	200.884
	17.6246	215.715
	301.298	71.8236
	55.5	612.045
	171.847	135.558
	0	104.924
	155.186	212.5
	179.722	103.952
	65.1831	311.47
	97.5	123.516
	124.007	205.5
	336.712	234.618
	137.364	725.586
	103.801	147.413
	310.347	34.608
	131.906	112.539
	173.741	151.529
	137.042	139.701
	40.9626	159.145
	297.408	275.414
	44.8814	30.7415
	30.7415	287.274
	379.773	76.5759
	61.5703	295.542
	250.215	144.514
	162.124	287.996
	149.5	95.9937
	108.482	390.651
	344.177	24.4258
	270.859	193.709
	89.5054	677.112
	10.03	774.109
	313.925	46.3365
	243.5	115.796
	206.222	64.8647
	282.977	108.505
	139.771	202.744
	326.305	219.078
	89.5	149.227
	275.349	84.8613
	0	325.75
	92.5158	131.145
	0	233.5
	181.353	162.439
	110.637	149.243
	2.5	81.6546
	74.4675	752.487
	223.354	123.373
	251.732	214.399
	102.576	244.02
	218.835	178.149
	151.23	686.226
	97.6299	106.917
	93.7549	36.5
	178.268	591.46
	58.9003	390.5
	299.685	78.0295
	89.4239	222.897
	83.906	672.104
	121.81	416.572
	0	342.146
	289.102	257.238
	325.601	201.147
	292.947	168.336
	234.635	48.6077
	10.03	219.824
	216.685	230.989
	17.5	35.9708
	19.7036	242.476
	273.616	242.622
	0	832.823
	0.5	137.931
	331.729	55.6808
	228.353	147.273
	84.1487	911.398
	48.1952	439.314
	42.7548	147.156
	231.444	100.825
	140.671	644.099
	126.968	315.011
	26.2924	178.842
	102.842	234.806
	61.1396	323.672
	129.348	310.156
	196.04	89.0478
	225.897	155.74
	47.9777	201.002
	183.753	53.8649
	312.646	55.5
	217.922	469.882
	5.5	211.088
	47.8289	304.07
	91.2443	432.27
	304.446	173.275
	0	267.5
	95.5	86.8197
	75.5	678.067
	192.938	0
	54.5	336.304
	43.4674	328.941
	218.52	55.8095
	173.059	51.5833
	21.5	207.881
	0	243.833
	8.5	314.153
	3.58276	841.043
	191.366	128.424
	215.293	620.734
	54.7451	195.452
	214.951	110.372
	100.747	236.257
	129.029	479.432
	0	107.395
	125.66	130.68
	253.925	151.5
	150.006	93.2131
	271.042	685.783
	74.5	647.869
	228.353	198.9
	121.697	712.438
	0	133.018
	0	226.483
	45.5	196.681
	144.105	209.7
	184.823	176.497
	298.041	250.502
	268.53	158.736
	120.991	707.241
	113.75	154.678
	172.503	190.565
	205.272	422.542
	87.4889	160.773
	45.6041	311.896
	27.2321	792.995
