# Supplementary material for: CXCR4high megakaryocytes regulate host-defense immunity against bacterial pathogens
Source: eLife. 2022 Jul 29;11:e78662. doi: 10.7554/eLife.78662 (PMC9374440; doi:10.7554/eLife.78662)
Supplement: Figure 2—source data 3. [file elife-78662-fig2-data3.xlsx]

## Sheet: Sheet1
Mean distance from simulations
Actual Random CXCR4low		Actual Random CXCR4high
87.6172		111.156
92.216		124.002
102.431		102.246
78.6671		120.045
82.9505		110.359
88.9102		118.312
85.7409		113.059
99.0261		109.069
83.2429		124.882
76.3083		127.331
76.8697		103.556
84.265		109.873
93.8233		100.592
92.6559		113.679
77.1969		85.4944
87.495		118.714
87.044		120.697
92.2143		113.275
95.8645		112.835
86.9741		109.941
81.6629		111.288
77.7284		121.102
96.5511		104.867
80.6034		101.053
83.6422		102.43
88.7162		98.6623
81.3531		91.0471
86.4991		108.055
87.3263		121.644
85.1893		96.9822
90.8545		115.296
86.2328		101.681
82.53		119.569
78.2412		115.444
87.351		116.892
84.4445		115.837
91.472		121.512
84.3847		105.516
76.7111		120.221
90.5788		126.508
95.2876		117.031
79.7874		96.2764
78.3042		109.253
94.7001		101.321
90.4591		118.057
86.6588		91.5568
93.5042		103.719
77.4508		113.889
85.1579		102.102
96.7515		99.3544
83.9708		119.649
91.6784		89.6957
82.8157		107.011
87.5962		122.435
99.032		113.452
93.399		108.428
91.2735		103.656
91.9485		105.47
95.4017		116.625
89.9536		114.937
82.9528		106.605
86.7945		115.526
74.9065		133.897
77.8977		121.399
81.6103		102.037
88.5232		120.595
82.0488		110.716
73.1926		109.008
95.885		126.628
89.0233		111.864
79.2455		105.867
87.5493		122.765
80.1599		109.783
83.0091		101.923
88.8906		101.739
93.0114		110.492
87.5268		103.545
97.3089		116.789
93.3769		110.554
82.9106		113.622
74.8093		128.985
96.3886		113.111
92.7309		106.052
95.5812		109.603
96.1671		98.2898
83.8457		100.043
83.9489		102.054
89.8983		110.15
102.006		111.493
94.6946		104.346
91.4935		111.082
76.1519		118.172
84.4084		111.631
92.2148		101.377
78.2544		111.377
81.1278		109.425
88.8284		115.631
85.8487		114
89.4462		121.872
82.0041		114.986
88.9752		114.314
84.3269		109.605
88.3204		111.095
92.6483		116.255
80.139		103.097
80.9675		103.694
84.6574		111.333
87.2106		107.279
87.9023		99.5805
93.9281		102.1
81.7149		114.229
80.3414		102.82
86.6095		109.636
76.118		117.596
79.9056		107.726
87.3754		112.93
93.0988		101.996
80.3379		116.498
91.2133		110.701
87.668		117.608
88.9479		97.3627
91.5438		107.284
85.3358		130.725
89.6952		122.903
87.6963		108.793
87.4523		103.427
78.1649		119.488
89.0205		90.5505
87.1782		127.777
96.0479		124.268
78.5447		104.891
90.1649		129.725
85.378		102.91
79.9727		88.9175
84.1624		108.303
85.7721		107.925
95.0732		109.849
77.9594		108.795
88.2371		105.7
88.9463		110.355
91.7435		111.316
77.9532		117.115
88.6912		92.5119
89.2051		101.474
83.7719		113.121
76.4483		111.937
78.0844		104.475
79.5524		94.5031
89.0284		100.531
89.5814		125.901
81.5715		115.919
86.2367		120.198
85.8285		106.789
91.2307		112.323
89.8614		109.586
90.4833		117.724
95.2418		118.334
78.0807		95.6784
89.4434		109.16
90.3371		100.373
84.5281		120.145
82.3756		115.393
91.6983		115.046
94.3743		120.09
81.1643		111.733
80.389		98.0934
94.5356		96.1425
86.1831		119.691
85.3841		114.818
79.7267		121.213
83.0661		121.588
96.0975		111.43
83.1208		102.628
80.0328		120.193
82.9659		94.7888
91.3045		109.202
91.5438		107.569
88.4715		114.23
88.8374		125.69
79.0324		101.362
82.7948		107.552
99.2921		141.854
83.1383		116.92
87.0705		93.1392
88.5625		118.34
86.8354		129.532
94.9589		107.998
94.8231		101.684
81.2564		117.918
79.5821		118.641
86.2825		92.9708
75.8005		105.987
91.9837		83.185
87.8395		117.331
90.1307		104.878
89.6178		120.93
84.088		106.632
71.763		113.494
91.3733		97.9757
85.5574		102.712
82.7673		119.141
87.1926		95.9748
83.0986		105.974
86.6143		114.273
79.166		105.192
90.4372		120.92
90.7915		113.878
75.8629		116.399
90.0452		111.741
81.1103		113.345
90.3983		117.358
81.3802		101.977
95.0507		89.6862
84.6886		86.6592
72.8151		109.609
73.3414		98.0215
92.4259		107.712
85.4918		110.317
96.7471		122.123
88.9423		107.113
79.1125		84.0248
84.8373		129.156
80.9278		114.164
90.4441		98.3035
80.9512		129.481
91.0242		120.33
80.6679		118.059
93.3791		102.508
82.142		99.2194
93.1531		104.628
79.2888		107.428
89.0423		124.417
98.0386		112.883
98.525		113.706
86.0128		107.293
76.2508		124.987
75.0036		104.926
92.0257		99.4184
85.4477		122.202
90.0372		107.269
96.3931		106.865
82.6588		119.499
87.2655		122.539
83.545		111.778
82.3537		104.685
90.6922		91.9124
88.3597		111.848
91.7338		110.233
91.9863		101.372
83.2327		119.834
81.3341		111.315
83.0317		116.021
81.2509		122.015
89.1983		104.737
90.1826		110.406
76.2702		120.812
83.5943		116.041
81.4249		110.639
84.9714		124.183
88.9566		126.846
92.8882		112.229
85.8938		107.811
86.948		120.64
85.2375		97.6469
78.6446		123.222
76.391		125.499
78.0923		104.831
88.129		110.423
85.9039		125.566
103.034		99.7493
82.7873		113.53
97.7656		107.15
95.0091		110.472
78.9545		100.376
91.5181		105.512
94.3912		99.7804
84.3264		129.163
87.8128		115.615
89.8664		116.008
88.8607		109.631
85.9891		88.8242
83.0295		137.594
91.669		117.495
98.9385		112.276
92.497		98.9824
85.1863		120.924
91.3293		116.13
72.9363		113.758
84.9182		118.223
86.6013		98.4748
87.3262		123.601
95.9275		111.884
88.2867		99.9103
92.8243		109.476
80.8283		114.276
87.3312		98.0775
92.0328		109.23
79.6077		99.6939
94.7493		116.714
92.0372		117.764
87.0718		134.719
71.071		98.0627
100.594		110.475
87.044		112.136
87.3259		98.8158
89.4021		118.402
77.3771		116.722
87.9859		102.123
78.3397		95.0057
79.303		96.1776
91.4279		126.738
78.6299		105.221
82.6772		105.57
75.4323		115.886
87.2371		114.784
83.0355		113.141
83.6307		118.928
91.0329		115.162
85.6846		122.929
88.5973		107.294
83.7911		107.575
82.6101		120.114
86.8111		103.214
81.7934		120.087
94.5025		113.597
86.662		127.191
80.2828		99.0368
84.2517		112.351
85.4683		108.703
91.2846		114.029
82.2293		98.2841
83.4397		98.7123
89.5487		108.87
80.4271		93.0938
81.2656		107.602
81.8841		131.1
89.3082		108.449
77.3212		115.396
99.0498		112.302
84.1305		105.1
83.1387		95.9694
81.574		125.701
89.4123		128.055
92.4094		124.071
85.0868		117.894
87.1287		112.114
79.5684		107.513
94.6506		97.0651
89.2573		102.574
82.0001		123.752
80.3647		111.168
98.8335		126.538
94.038		93.7912
84.1835		108.849
90.4217		138.605
72.8031		110.709
92.926		108.915
87.0729		114.544
90.762		112.231
89.6919		118.836
101.923		131.424
78.486		116.978
80.2499		100.697
74.8443		106.921
100.825		100.338
98.5701		103.268
81.1266		113.753
90.1929		112.577
68.5963		121.297
87.5518		97.2666
78.5869		109.96
91.2293		133.478
85.0762		109.793
91.8293		109.42
84.7049		101.278
92.8623		106.412
84.9471		108.755
90.2246		89.4489
100.132		105.384
91.5436		116.02
83.3402		103.836
89.6231		103.095
91.7973		107.488
86.2235		116.185
88.3382		104.709
93.2555		103.703
87.4698		118.754
90.8609		95.3911
84.4125		96.5207
89.2591		128.066
88.8487		95.7844
79.939		115.839
87.849		109.734
86.6808		116.905
88.7496		119.475
87.7241		104.266
90.5133		103.275
97.1382		120.55
76.4733		95.9355
86.8228		113.201
93.8682		109.266
83.9222		92.8386
97.2686		103.88
100.71		114.06
85.2455		116.214
84.2488		107.502
86.2463		128.964
82.7702		111.42
85.8343		114.427
75.51		113.967
84.308		102.464
93.1342		123.069
99.9645		113.506
96.5726		102.943
93.6433		113.523
96.445		97.441
80.4145		92.7162
84.2365		115.611
100.2		92.8905
86.4632		101.255
83.8519		106.412
86.5065		108.275
86.124		134.608
81.586		107.445
74.3781		106.218
84.5782		106.152
92.103		110.625
82.4472		107.909
81.0327		105.06
82.4833		98.9309
85.2879		97.9067
83.6456		111.93
79.6472		101.275
93.8033		94.1521
99.7511		114.981
86.68		106.984
93.1105		120.714
89.9444		103.549
78.9234		106.113
76.7188		114.834
89.6977		94.4648
85.4535		107.562
89.5448		98.5292
85.5335		118.917
87.3447		116.334
91.5102		98.4232
88.043		121.184
90.7542		96.5007
80.9907		81.0486
98.6526		108.572
78.4726		126.656
85.0107		133.676
88.5473		109.177
85.3414		122.829
86.4292		115.153
85.2721		103.338
88.6985		99.728
84.9171		121.54
85.5776		113.08
89.2727		122.148
81.0504		118.578
91.6955		92.5786
82.2973		102.738
91.4335		111.866
83.4176		106.867
80.7138		109.646
91.3981		118.274
99.3349		113.505
82.2028		96.439
91.1552		103.088
85.5799		98.9809
85.1381		106.591
91.2991		102.442
85.8789		111.348
83.3728		105.045
86.5251		116.774
87.9552		124.813
82.4777		119.823
85.0377		108.615
95.5457		106.452
89.0665		110.426
89.2121		110.396
90.4126		96.8504
86.2306		90.7025
82.1368		115.403
80.9947		108.182
93.1432		122.419
97.6915		117.043
91.7971		111.103
88.4519		111.726
92.2126		117.71
95.9802		110.594
79.6512		114.343
85.5254		99.1617
75.9125		120.03
82.415		130.15
90.6252		109.902
80.5992		122.287
78.9072		127.277
89.717		102.253
