# Supplementary material for: CXCR4high megakaryocytes regulate host-defense immunity against bacterial pathogens
Source: eLife. 2022 Jul 29;11:e78662. doi: 10.7554/eLife.78662 (PMC9374440; doi:10.7554/eLife.78662)
Supplement: Figure 4—source data 1. [file elife-78662-fig4-data1.xlsx]

## Sheet: Sheet1
Distance of HSCs to MKs
Control1	Control2	Control3	Infection1	Infection2	Infection3
15.7	49	15.6	19.6	0	18.5
93.4	10.1	72.8	14.8	3.42	12.9
8.4	33.8	9.79	5.67	11.3	3.73
29.9	10.8	24.1	13.9	19.7	10.5
4.85	0	0	6.36	22.5	36.6
12.5	14.2	0	20.6	0	4.46
8.1	0	18.6	6.65	34.1	8.4
42.8	4.74	7.34	26.1	8.67	8.5
55.9	17.1	34.7	11.5	12.6	8.9
7.65	18.1	14.2	0	9.72	3.7
7.92	48.9	22.5	4.03	19.4	5.24
0	11.2	17.6	21.5	0	20.8
7.51	25.1	2.34	4.92	27.8	56.4
14.1	16	8.21	9.47	0	14.1
34.8	21	24.7	19.7	60.5	20.4
23.7	0.999	0	19.9	2.53	1.3
15.4	4.51	42.1	0	42.7	33
10.1	0	33.9	0	6.61	18.8
17.6	7.44	50.2	17	15.5	3.87
22.7	13.5	60.9	0	7.79	38.1
33.7	11.4	0	10.1	13.2	18.1
33	0	9.89	0	24.8	25.7
6.67	0	17.7	0	0	3.79
26.5	26.7	28.1	7.59	0	27.6
74.1	14.4	40.2	0	11.8	18.9
	40.1	8.21	8.13	4.27	8.2
	8.71	19.9	15.6	30.3	9.6
	20.1	20.1	53.4	7.24	10.6
	0	50.4	0	17.2	4.36
	12.4	27.3	0	14.1	21.1
	15.4			33.4	14.8
	7.04			34.8	12.9
	0			0	4.43
	75.4			27.9	23.3
	72.2			38.3	21.5
	16.4			56.5	25.3
	10.6			44.7	31
	8.59			12.4	10.5
	38.8			41.3	7.59
	0			7.27	8.2
	41.9				3.73
					10.3
					15.3
					32.5
					17.3
					3.02
					10.5
					12
					43.7
					5.2
					1.06
					14.2
					17.6
					8.9
					9.1
					1.39
					14.2
